# Supplementary material
Source: PubMed Central journal article supplement (PMC153059)

**B29**

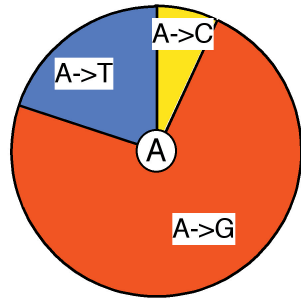

A = 24%

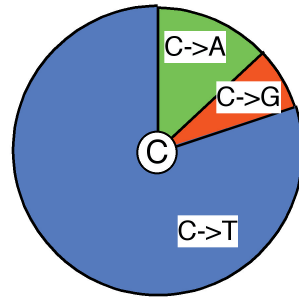

C = 24%

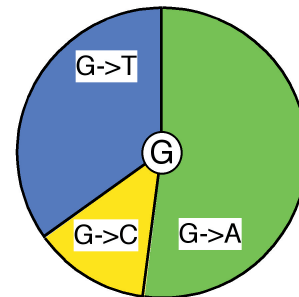

G = 37%

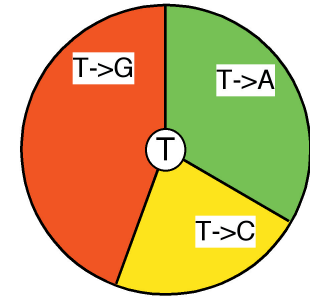

T = 15%

**mb1**

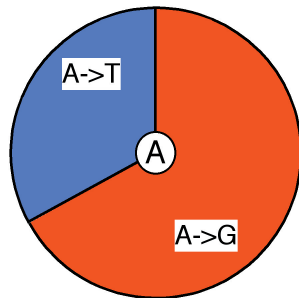

A = 19%

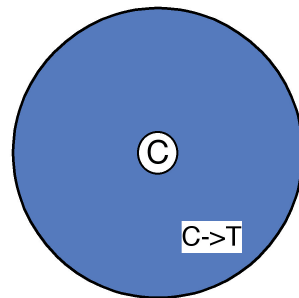

C = 44%

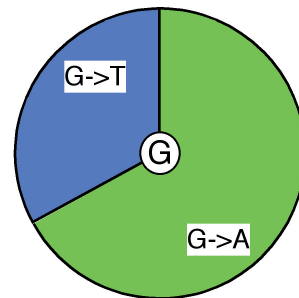

G = 38%

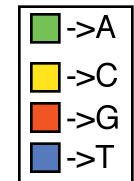

Supplement: pnas_0735266100_7.pdf [file pnas_0735266100_7.pdf]
